# Supplementary material
Source: PubMed Central journal article supplement (PMC2859431)
Supplement: NIHMS100004-supplement-Sup_Data.pdf [file NIHMS100004-supplement-Sup_Data.pdf]

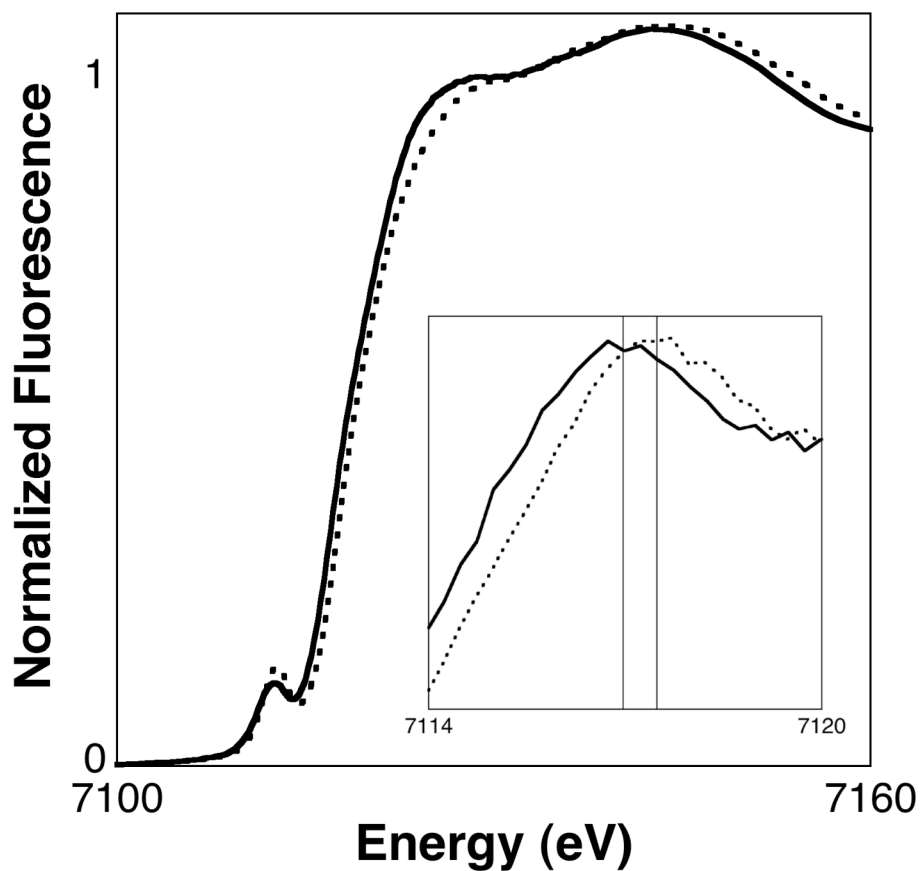

Fig. S1 Normalized XANES spectra for the as purified, oxidized (dotted line) and reduced (solid line) CopZ samples. The inset shows the first inflection point for the two samples with the vertical lines indicating the values of 7117 and 7117.5 eV values respectively (see section on XAS results).
